# Supplementary material for: The implementation of NEMS GFS Aerosol Component (NGAC) Version 2.0 for global multispecies forecasting at NOAA/NCEP: Part II Evaluation of Aerosol Optical Thickness
Source: Copernicus journal article supplement (doi:10.5194/gmd-2017-307), 2017-12-20
Supplement: Supplementary file [file gmd-2017-307-AC2-supplement.pdf]

Response to the Reviewer 2 comments. Original comments are in bold italics, our response is in regular font.

### *General comments*

***This is a companion paper to Part I, which presents a new version of NGAC including a fuller range of aerosol species compared to the previous dust-only version. In this paper, a thorough evaluation of the new model is presented, demonstrating good performance in many cases but also identifying a number of errors and biases that might be addressed in a subsequent version. I would recommend publication in GMD subject to the following major comment and further minor comments below.***

We greatly appreciate Reviewer's comments. We believe addressing the comments listed below resulted in a significantly improved presentation. The Reviewer's effort is greatly appreciated,

### *Specific comments*

***Major comment. I would draw particular attention to the Section 5 discussing Figure 6, where a number of aspects of the seasonal cycle are stated in the text, while the figure doesn't appear to present any seasonal information. I would strongly recommend to ensure that the necessary information to visualise these seasonal effects is included in the figures.***

We thank the reviewer for pointing this out and we added a new figure in the manuscript to address this comment. New figure 8 in the manuscript shows time-series of NGACv2 and AERONET stations (correspond to same stations in new Figure number 7). Time-series plot show seasonal variation of both dataset that is mentioned in the text and answer to reviewer's other questions related to now figure 7 (in the questions below). We also have corrected manuscript text (in Section 5) and added few lines/sentences where reference to Figure 8 is mentioned with new figure numbers. Subsequent changes in the other figure numbers in the manuscript are made.

Revised manuscript : Page 8, line 35 added this sentence “Figure 8 shows entire 17 month time-series of AOT at same twelve stations shown in Figure 7 between the two”. Also added Figure 8 in page 29.

*p.1, line 23: data assimilation does not improve the actual model bias, it merely compensates for it in the overall forecasting system (which would still be expected to perform better if the model were unbiased).*

We used the term “bias” to broadly include any type of error that is systematic rather than random. We followed reviewer suggestion and edited the sentence by removing “improve some of the model biases” from that sentence and added “provide positive impact in the aerosol forecast by the model”.

Revised manuscript: Page 1, line 23, added “provide positive impact in the aerosol forecast by the model”.

*p.2, line 22: the MACC project has now transitioned into the operational Copernicus Atmosphere Monitoring Service (CAMS).*

We made the correction in the text.

Revised manuscript: at page 2, line 22.

*p.3, line 32: I’m not sure “represents an efficient way of transitioning research. . . ” is particularly relevant for a model evaluation paper.*

We described implementation of new global forecast model at NOAA, which is joint collaboration with NASA is an example of Research to Operations (R2O).

*p.4, line 8: I would suggest “as well as” rather than “apart from” – the latter suggests that mixing ratios are the exception that is not available.*

Corrected.

Revised manuscript: at page 4, line 8.

*p.4, line 18: as mentioned later in the paper, using gridded Level-3 data may result in sampling errors compared to matching the model output with Level-2 data; given the known limitations it would be good to explain the reasons for and implications of this choice.*

We agree with reviewer comment that using Level-2 satellite swaths coincident with model forecast time would have produced less sampling error. However, in this paper our main focus was to check long-term model forecast in global regions and we looked into major aerosol events in general. With subsequent upgrade of the model we will conduct more detailed comparison with other dataset using coincident observation samples in near future.

*p.5, lines 1–2: as above, MACC is now CAMS.*

Corrected.

Revised manuscript: at page 5, line 2.

*p.5, lines 10–12: if “no horizontal interpolation was needed”, this is only because it has already been performed upstream – not because the data is being used at its native resolution.*

We agree with reviewer comment.

Revised manuscript: page 5, line 11, we have removed “no horizontal interpolation was needed to put the different data sources onto a single grid” from the sentence.

*p.5, lines 23–24: please explain the rationale for the choice of 2.5 as a threshold, and quantify the proportion of data excluded.*

We found some of AERONET station data during high aerosol events report AOT values (range from 3-8), which would be impossible by the model to correctly forecast (due to resolution). We used the threshold of 2.5 which correspond to lower number of data to be excluded for statistical calculation. Nearly 3% of sample points are excluded with this threshold.

Revised manuscript: at page 5, line 24-26, we have added “Some of the station data report AOT of 5 and above in extreme high aerosol events (smoke and pollution transport) which may not be simulated by the model due to coarse resolution. We estimated approximately 3% of the data are discarded due to this threshold”.

***p.6, line 1: It is suggested that Figure 1 shows seasonal variation to be in qualitative agreement, but this figure only appears to show one season so what is the evidence for this statement?***

We looked into all the seasons between 2015 and 2016 for comparison with ICAP and MODIS. We selected one representative season (2015 JJA) to show seasonal variation in the figure 1. Correlation and RMSE for all six seasons are described in Table 1. Our statement of seasonal variation based on both Figure 1 and Table 1 statistics.

Revised manuscript: at Page 6, line 3, we have added “We analyzed model results for both 2015 and 2016 and Figure 1 shows results from 2015”.

***p.6, line 5: The text says South Africa (usually referring to the specific country), but from the plot it looks more like southern Africa in general is probably meant? Please check and clarify if necessary.***

We thank reviewer for pointing this and we corrected the sentence with “Southern Africa”. We selected biomass burning zone south of equatorial Africa for Figure 1 and table 1.

Revised manuscript: Page 6 line 12, corrected South Africa with “southern Africa”.

***p.6, lines 8–10: Given these sampling errors, why not work why not collocate the model output with level-2 data?***

As mentioned before, we agree with reviewer statement. However, collocation of observation in Level 2 data and matching that with model forecast time is beyond the scope of this study. We focus on general model characteristic over different aerosol regimes with new capabilities of detecting biomass burning aerosols. Also, present simulations cover six seasons that correspond to the time period when GBBEPx emissions are generated for pre-implementation evaluation. The collocated approach for this relatively short period of time could lead to a small sampling size due to the collation screening.

***p.6, line 13: why are only dust and OC shown in Figure 2? Is this because other species can be considered negligible here?***

Dust and smoke aerosols shown in Figure 2 are dominant aerosols for the region considered. We picked OC as a representative of biomass burning aerosol in the figure to show model sensitivity in this region and compared with observation.

***p.6, line 31: “of the s kind” – please check!***

Corrected.

Revised manuscript: Page 7, line 2.

***p.7, lines 10–11: agrees in general but the peak is overly broad.***

We agree with reviewer comment on this.

Revised manuscript: at page 7, line 19-20 we added this sentence “However, NGACv2 simulated peak is broad compare to other two indicate model is less sensitive to capture some of AOT variations over Canada (Figure 4c)”.

***p.7, line 20: also very low correlation in MAM16 as well as high RMSE.***

We agree with reviewer comment on low correlation and high RMSE about middle-east dust AOT in 2016. Dust intensity in 2015 and 2016 are different and model seems to capture 2015 event better than 2016.

***p.8, lines 9–13: it’s unclear why increased cloud thickness would lead to reduced regions of high humidity and thus less hygroscopic growth and lower AOT.***

We have made correction in the text and removed the sentence “The GFS also tends to overestimate cloud layer thickness, particularly for deep convective clouds in the tropical regions” from the text to avoid any confusion. In this paragraph we discussed possible reasons for model’s underestimation of AOT over South-East Asia during summer months. Study by Yoo et al. (2013) which is referred in that section diagnose GFS biases in simulating low-cloud fractions against satellite and ground observations.

Revised manuscript: Page 8, line 27 we have removed this sentence “The GFS also tends to overestimate cloud layer thickness, particularly for deep convective clouds in the tropical regions”.

***p.8, lines 22–23: where is it shown that the model overestimates AOT during November–March? I can't see this in the figure referred to here (Fig. 6).***

We added new figure (8) in the manuscript that show model overestimation over AERONET location Tamanrasset between November and March (Figure 8a).

Revised manuscript : Page 29, added Figure 8 that correspond to all locations described in Figure 7. Also added reference to figure in page 9, line 5.

***p.9, lines 9–10: again, where is it shown that the model underestimates AOT in September–November?***

We added new figure (8) that show model underestimation over AERONET location Alta Floresta (in South America). The underestimation is during the forest fire season over Brazil (Figure 8g).

Revised manuscript : Page 29, added Figure 8 that correspond to all locations described in Figure 7. Also added reference to figure in page 9, line 27.

***p.9, lines 15–16: again, where is it shown that the model closely reproduces this higher AOT?***

We added time-series figure of Fort McMurray (located in North America) for the entire 17month period here. It compares NGACv2 daily forecast (blue line) and AERONET observation (red points) at that location. The model captures high biomass burning events during summer of 2015 and 2016 and peak intensity matches with AERONET observation and correspond to description in the manuscript.

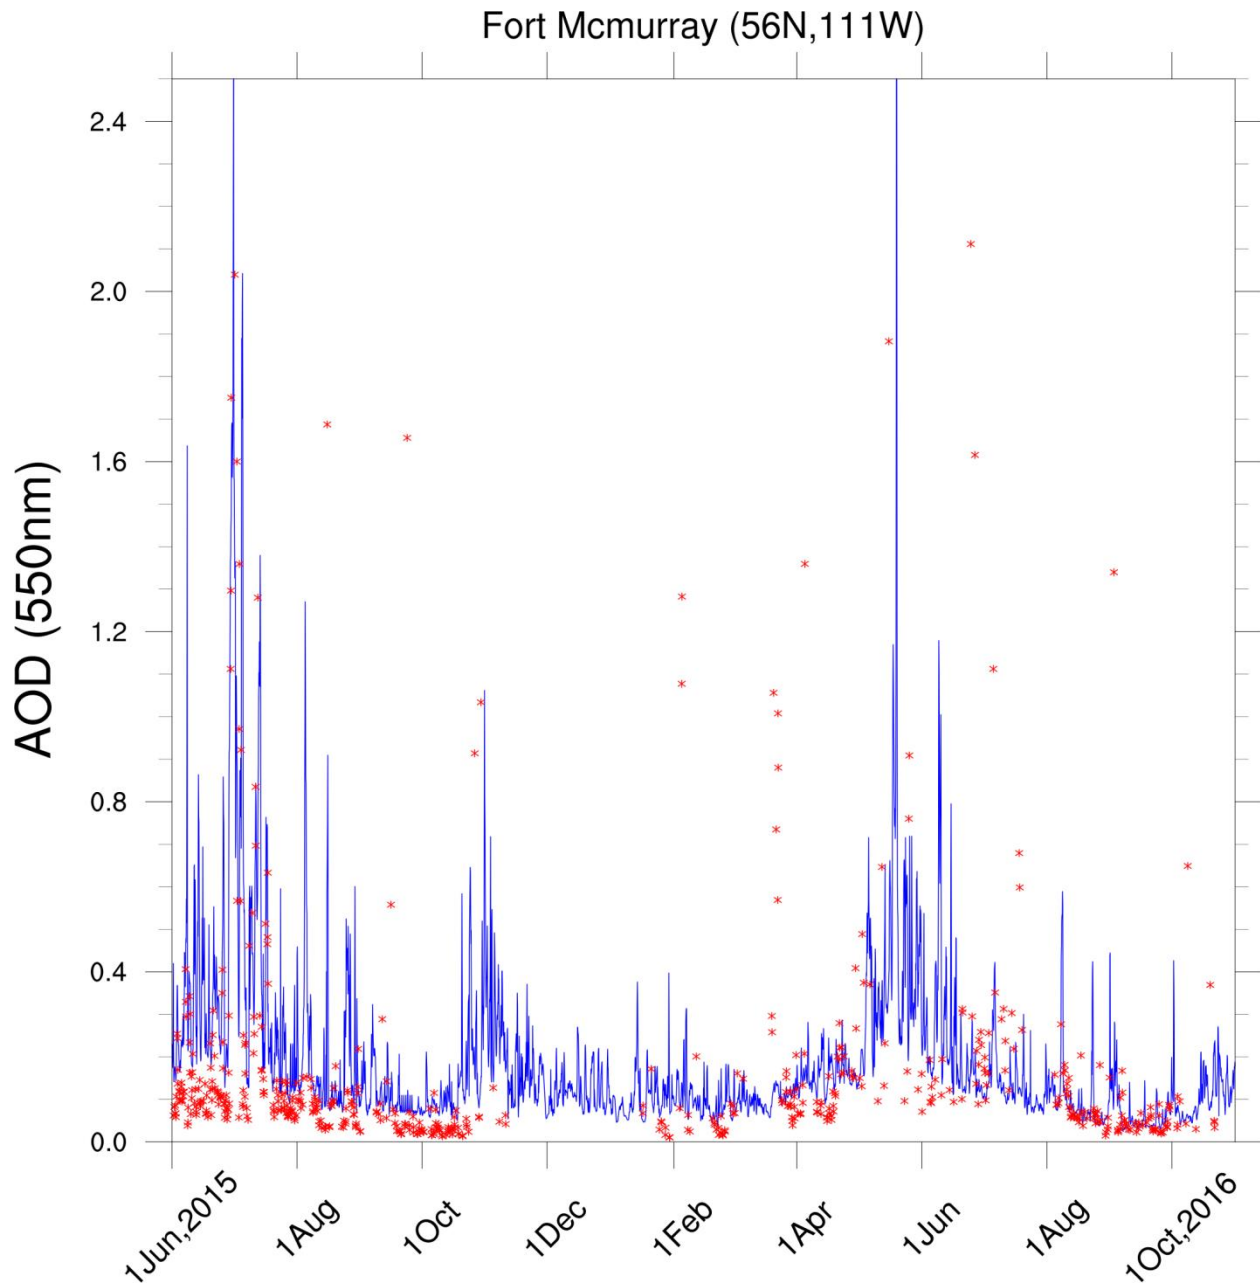

*p.9, line 24: Should this be “The remaining 13 sites” rather than “the rest of the 13 sites” (which would suggest there are only 13 in total)?*

Corrected.

Revised manuscript : Page 10, line 7 corrected the sentence.

*p.9, lines 25–26: again, where is it shown that modelled AOT is higher than AERONET in May–October?*

We added time-series figure of Mauna Lua (located in Hawaii) for the entire 17month period here. It compares NGACv2 daily forecast (blue line) and AERONET observation (red points) at that location. It shows the model overestimate AOT for the entire time-period against ground observations and correspond to description in the manuscript.

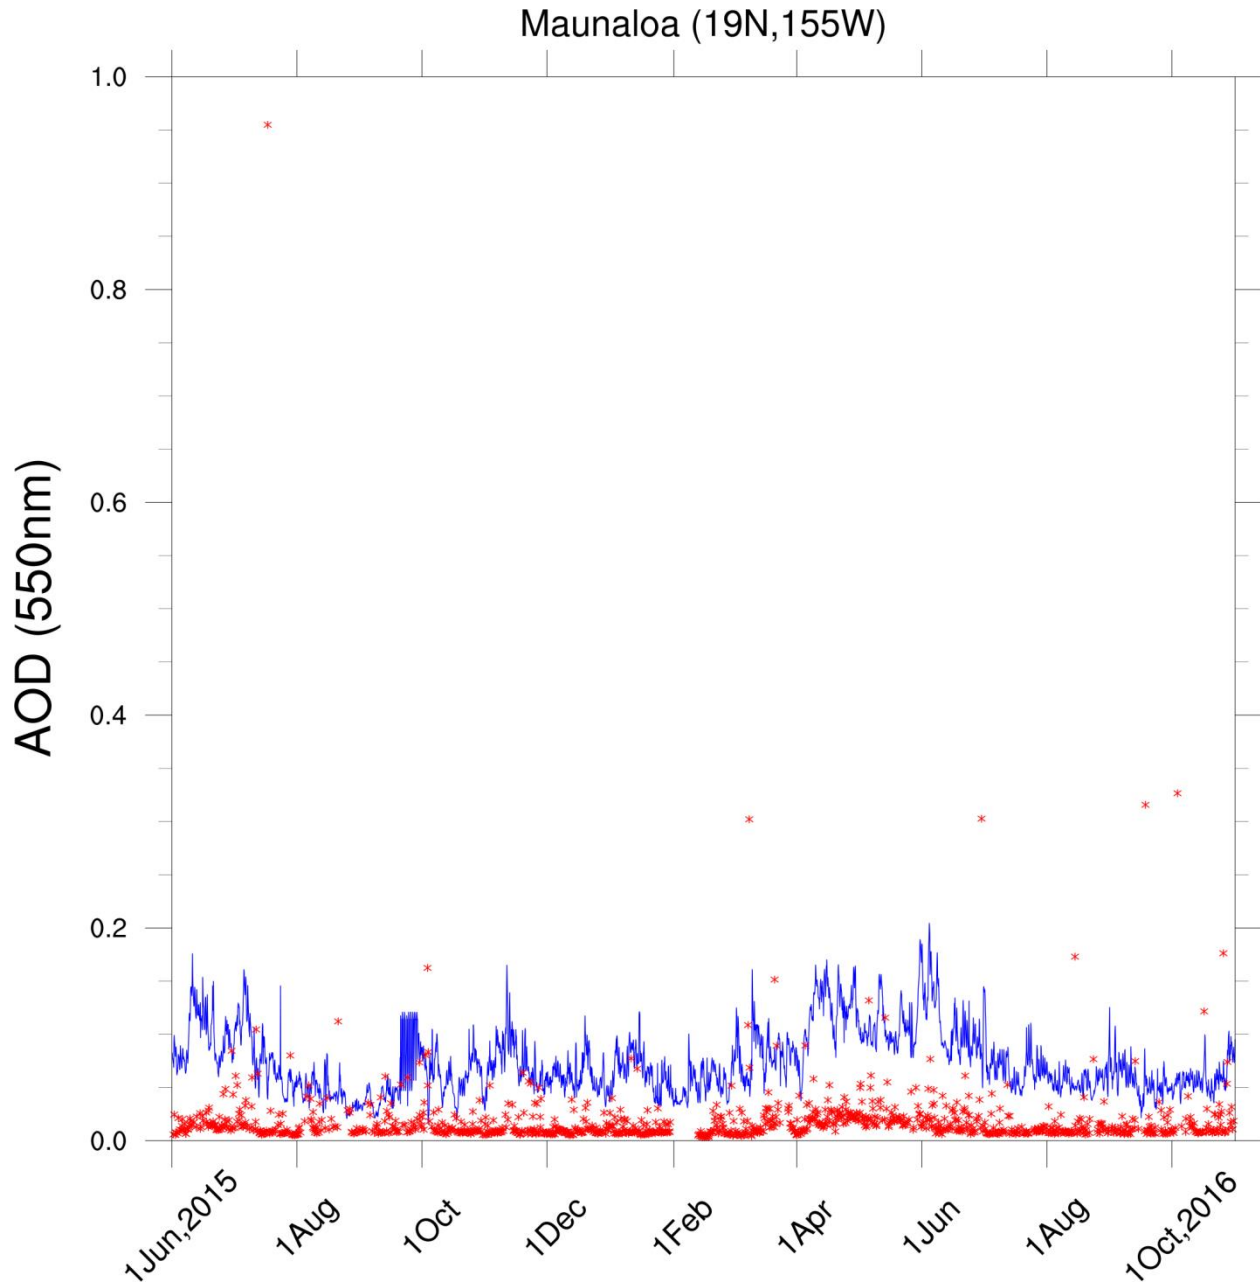



*p.9, lines 35–36: where is this underestimation during the summer months shown?*

We added time-series figure of Mexico City for the entire 17month period. It compares NGACv2 daily forecast (blue line) and AERONET observation (red points) at that location. It shows the model underestimates AOT for majority of the time period and underestimation is higher during summer months and correspond to the description in the manuscript.

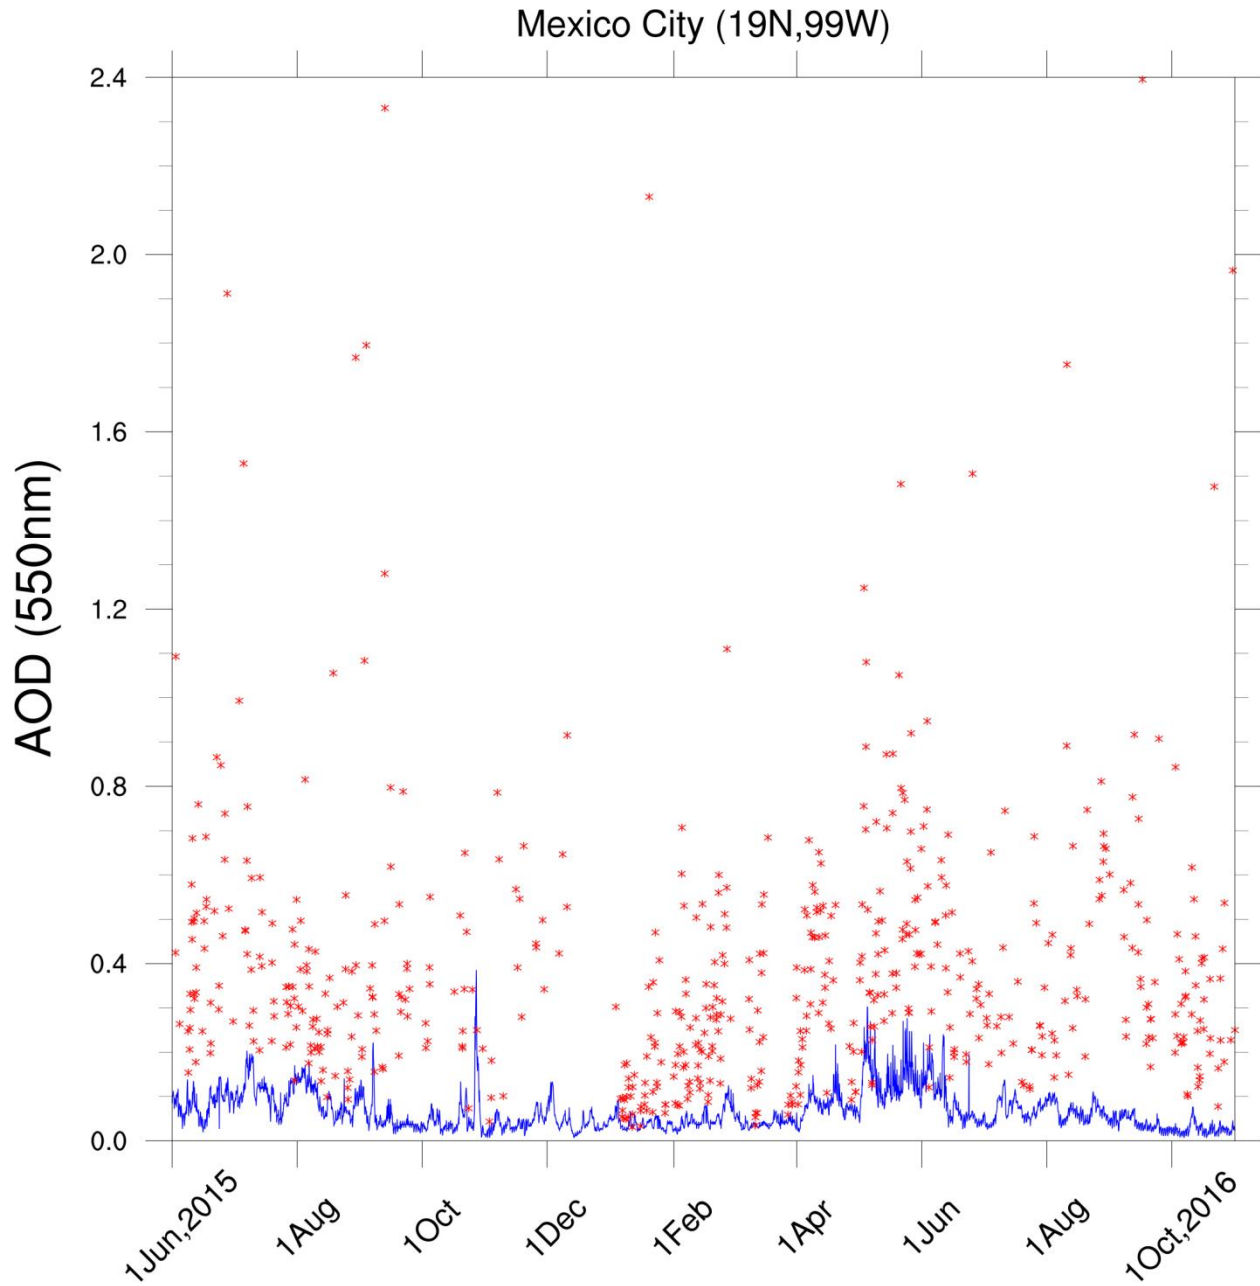

***p.10, line 14: Figure 8 is not properly introduced until the following paragraph. Also, it might be worth including the ICAP MME in this one.***

We included 6-hourly forecast of ICAP-MME in Figure 10 (revised figure number) over the same AEORNET location shown in Figure 9. Gaps in ICAP-MME forecast is due to use of 6 hourly data, whereas NGACv2 is at every 3 hour.

Revised manuscript : Added ICAP-MME at Page 32 Figure 10. Added reference to figure in page 11, line 1.

***p.10, line 23: “some. . . are higher than the model” – this is over-optimistic; from the figure it appears that almost all are, and some significantly.***

NGACv2 underestimate initial biomass burning episode between 1<sup>st</sup> and 14<sup>th</sup> of July, 2016 (Figure 9). Model’s peak intensity is lower than AERONET and ICAP-MME during that time. However, as shown in Figure 9, when more intense burning reported (between 16<sup>th</sup> to 25<sup>th</sup> July) and observed over Southern Africa , model AOT intensity matches closely with ICAP-MME which is at same 1° resolution (Figure 10).

***p.11, line 12: Quantify “correlates well” with an r value.***

We added correlation (r) value of that location in the manuscript.

Revised manuscript : at page 11, line 33.

***p.11, lines 15–16: the peaks coincide, but the matching of intensity is quite variable.***

We agree with reviewer comment about intensity. This difference may also arise from mismatch between model grid compared against a point location.

Revised manuscript: Page 12, line 1-2 we added “model simulated intensity is lower compare to the observation”.

***p.11, line 24: it is not obvious why combining multiple observation sources increase uncertainty; much retrieval and data assimilation theory is about using these to reduce the resulting uncertainty.***

We stated about multiple observations in the context of comparing against model forecast. As different observations contain different calibrations, resolution, wavelengths for AOT product to consider before comparison against the model. In this preliminary study with new capabilities of the model, our primary focus is to look into any systematic error by the model in the study period. That is why we have used only MODIS satellite data for AOT and avoided any other uncertainty associated with comparing against different satellite products. We would like to use multiple satellite data in future for more advanced study with model AOT forecast.

***p.11, line 29: ICAP-MME is not observations, but an ensemble of models.***

We mentioned ICAP-MME as multi-model ensemble in that sentence and different than satellite or other observations.

Revised manuscript : at page 12, line 9.

***p.12, line 14: Should be “a” large underestimation, not “at”.***

Corrected.

Revised manuscript : Page 12 line 35.

***p.13, line 4: a link or reference should be provided for NCL.***

We added a link to NCL home page in the manuscript.

Revised manuscript : at Page 13, line 26.

***Table 1: This table is quite hard to digest; consider presenting visually e.g. with a Taylor diagram***

We thank reviewer for the suggestion. We have added Taylor diagram (Figure number 5) to show seasonal variations at same locations mentioned in Table 1.

Revised manuscript : at Page 26 we added Figure 5. Also, added description about the figure at page 8, line 8-16 as “We used Taylor diagrams to summarize model performance in different seasons over the same regions described in Table 1 (Figure 5). Taylor diagrams (Taylor, 2001) provide a statistical summary of comparisons between NGACv2 and MODIS observations in

terms of their spatial correlation coefficients and the ratio of spatial standard deviations of the model and observations over all twelve regions. The spatial correlation coefficient is the quantity that measures the degree of agreement of two fields and standard deviations are normalized by the corresponding observations. In general, model's performance is better in summer months (JJA, Figure 5a) than other seasons in terms of low variance and high correlations over most of the regions. However, in future we needed a more detailed study to understand some of the interannual variations shown by the model, particularly over land regions (Figure 5)".
